# Supplementary material for: Prospective Evaluation of the Concordance of Commercial Circulating Tumor DNA Alterations with Tumor-Based Sequencing across Multiple Soft Tissue Sarcoma Subtypes
Source: Cancers (Basel). 2019 Nov 21;11(12):1829. doi: 10.3390/cancers11121829 (PMC6966562; doi:10.3390/cancers11121829)
Supplement: Supplementary file 1 [file cancers-11-01829-s001.pdf]

**Table S1.** Summary of Clinical Characteristics.

| Patient ID | Metastases | Tumor Fraction | Tumor Volume |
|------------|------------|----------------|--------------|
| 1          | 5          | 0.2345         | 174.2        |
| 2          | 3          | 0.0157         | 69.3         |
| 3          | 3          | 0.0202         | 46.2         |
| 4          | 3          | 0.0019         | 75.7         |
| 5          | 2          | 0.1158         | 8069.5       |
| 6          | 5          | 0              | 294.7        |
| 7          | 2          | 0.0362         | 77.9         |
| 8          | 4          | 0              | 926.1        |
| 9          | 1          | 0.0014         | 4.5          |
| 10         | 6          | 0.0167         | 37.5         |
| 11         | 2          | 0              | 759          |
| 12         | 4          | 0.0036         | 127.6        |
| 14         | 5          | 0.013          | 179.9        |
| 15         | 1          | 0              | 79.7         |
| 16         | 2          | 0              | 3.6          |
| 17         | 4          | 0.0031         | 1019.8       |
| 18         | 5          | 0.0089         | 91.7         |
| 19         | 6          | 0              | 15.2         |
| 20         | 4          | 0.1086         | 1499.9       |
| 22         | 3          | 0.001          | 22.6         |
| 24         | 6          | 0.4623*        | 1625.4       |
| 25         | 4          | 0.0112         | 19.8         |
| 26         | 2          | 0.0022         | 3.5          |
| 27         | 1          | 0.0175         | 1608.4       |

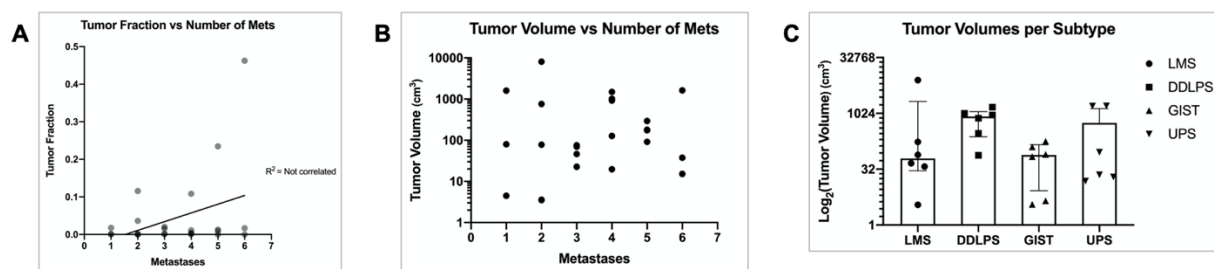

**Figure S1.** (A) No significant correlation between subjects' TF and quantity of metastases. (B) nor tumor volume and quantity of metastases. (C) Tumor volumes across the four subtypes were comparable

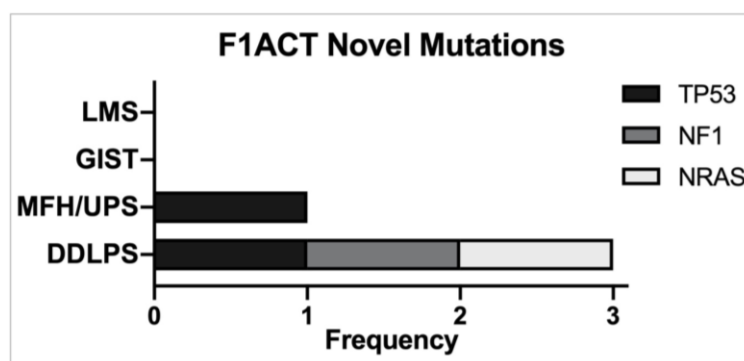

**Figure S2.** FM Data Collection Form. Across all 24 STS subjects who underwent both NGS assays, F1ACT methods identified four mutations not previously reported in F1Heme.
